# Supplementary material for: A novel multi-tissue RNA diagnostic of healthy ageing relates to cognitive health status
Source: PubMed Central journal article supplement (PMC4561473; doi:10.1186/s13059-015-0750-x), 2015-09-07

**A**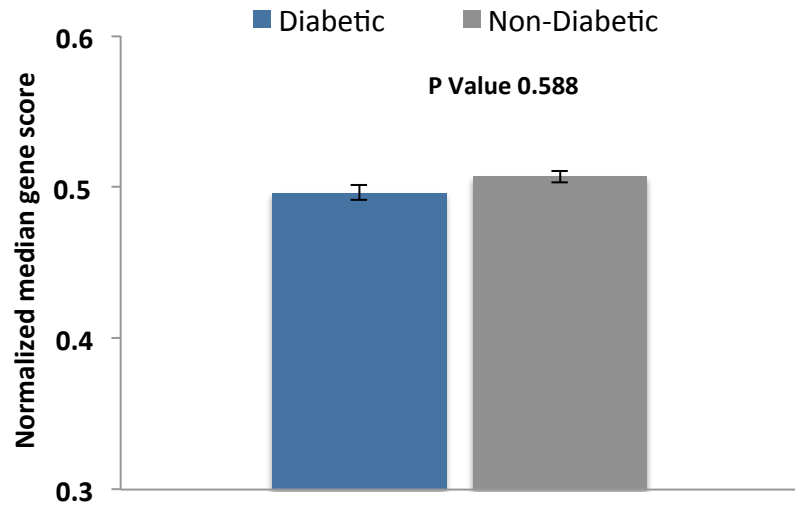**B**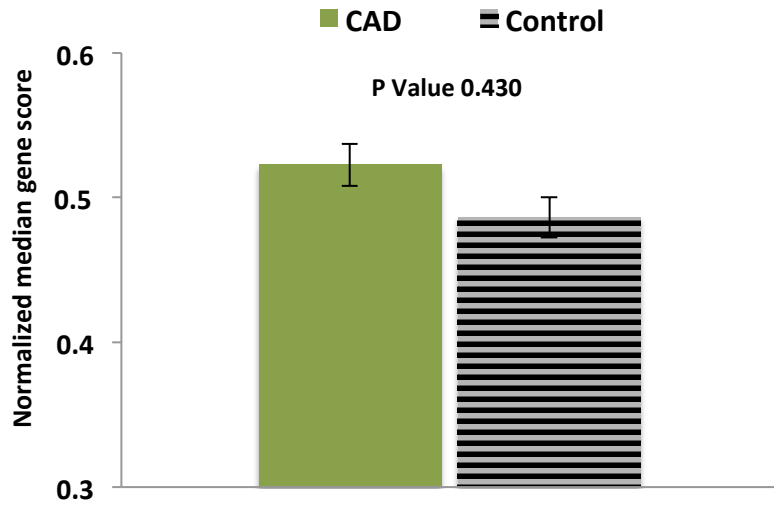

Supplement: 13059_2015_750_MOESM4_ESM.pdf [file 13059_2015_750_MOESM4_ESM.pdf]
